# Supplementary material for: Intense UV long persistent luminescence benefiting from the coexistence of Pr3+/Pr4+ in a praseodymium-doped BaLu2Al2Ga2SiO12 phosphor
Source: Royal Society of Chemistry journal article supplement (doi:10.1039/d1tc00584g), 2021-01-01
Supplement: d1tc00584g1.pdf [file d1tc00584g1.pdf]

## Supporting Information

### **Intense UV long persistent luminescence benefiting from the coexistence of Pr<sup>3+</sup>/Pr<sup>4+</sup> in praseodymium doped BaLu<sub>2</sub>Al<sub>2</sub>Ga<sub>2</sub>SiO<sub>12</sub> phosphor**

Weihong Yuan,<sup>a,b</sup> Tao Tan,<sup>a,b</sup> Haiyan Wu,<sup>a,b</sup> Ran Pang,<sup>\*a</sup> Su Zhang,<sup>a</sup> Lihong Jiang,<sup>a</sup>

Da Li,<sup>a</sup> Zhijian Wu,<sup>a</sup> Chengyu Li<sup>\*a,b</sup> and Hongjie Zhang<sup>a,c</sup>

<sup>a</sup> *State key Laboratory of Rare Earth Resource Utilization, Changchun Institute of Applied Chemistry, Chinese Academy of Sciences, Changchun 130022, P. R. China*

<sup>b</sup> *University of Science and Technology of China, Hefei 230026, China*

<sup>c</sup> *The GBA National Institute for Nanotechnology Innovation, Guangzhou 510535,*

*China*

*\* Corresponding author: Tel: +86-0431-85262258*

*E-mail address: cyli@ciac.ac.cn and pangran@ciac.ac.cn*

## Computational Details

We have employed the first-principles to perform all Spin-polarization density functional theory (DFT) calculations within the generalized gradient approximation (GGA) using the Perdew-Burke-Ernzerhof (PBE) formulation.<sup>1-3</sup> We have chosen the projected augmented wave (PAW) potentials to describe the ionic cores and take valence electrons into account using a plane wave basis set with a kinetic energy cutoff of 400 eV. In all the calculation, we used  $3\times 3\times 3$  for the Monkhorst-Pack k-point for periodic crystal structure. The convergence threshold for energy was set at  $10^{-6}$  eV. The equilibrium lattice constants were optimized with maximum stress on each atom within 0.05 eV/Å. The Hubbard U (DFT+U) corrections (4.78 eV) for Lu atom had been chosen.

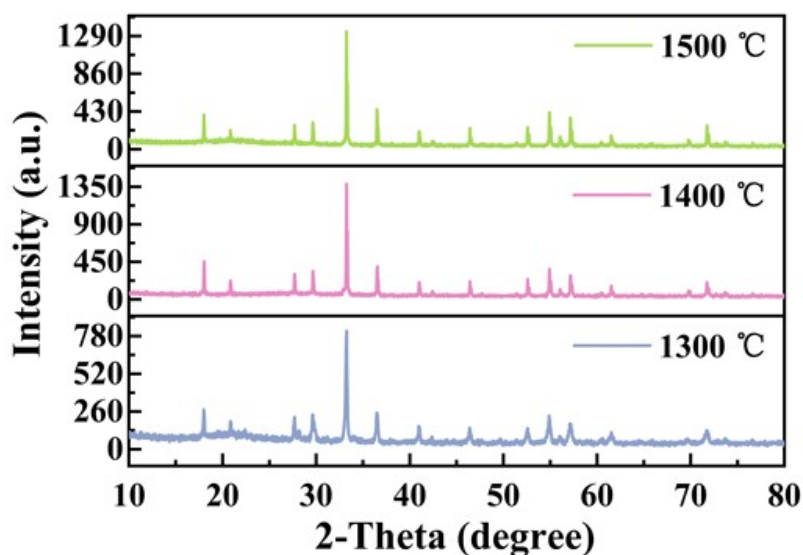

**Fig. S1** XRD patterns of BLAGSO:0.04Pr<sup>3+</sup> synthesized at different temperatures.

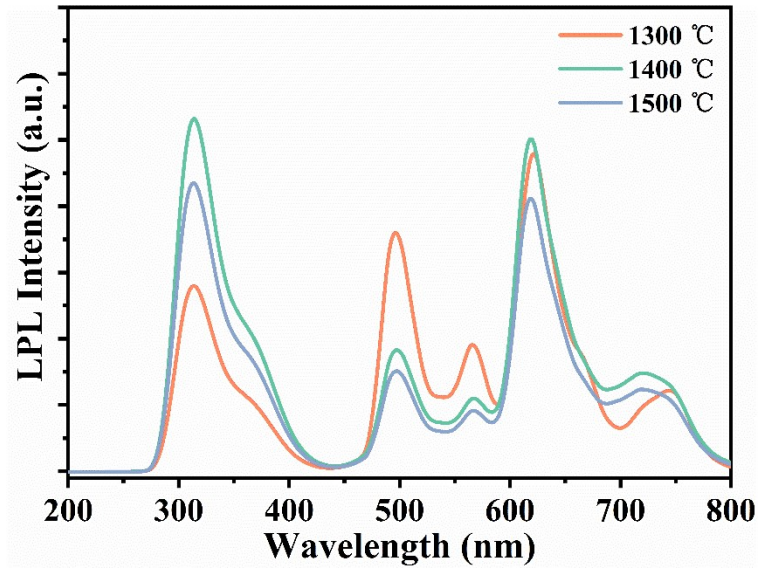

**Fig. S2** The LPL spectra of BLAGSO:0.04Pr<sup>3+</sup> synthesized at different temperatures.

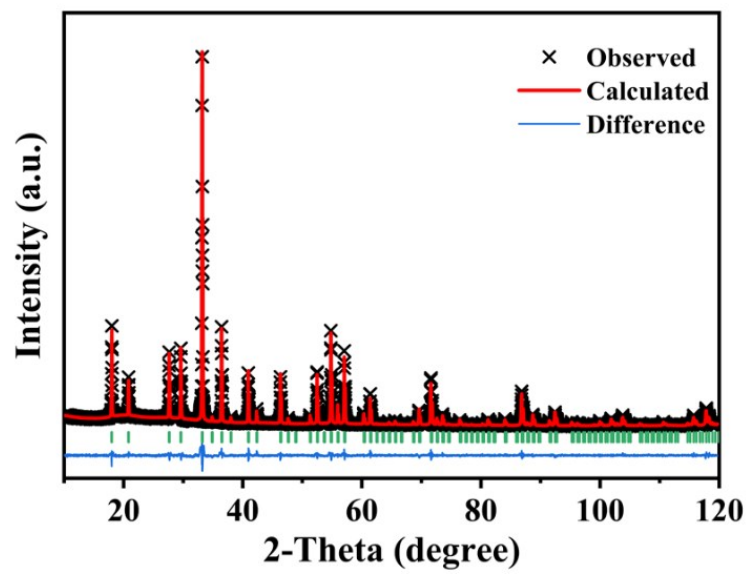

**Fig. S3** XRD profile for the Rietveld refinement result of BLAGSO.

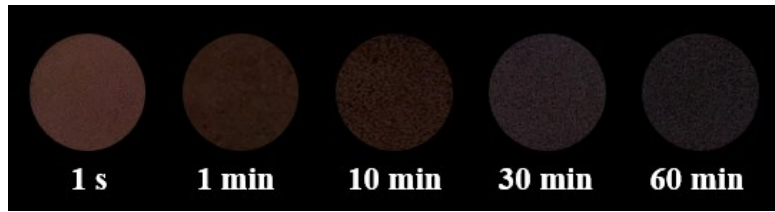

**Fig. S4** The LPL images of BLAGSO:0.04Pr<sup>3+</sup> taken at different afterglow time.

**Table S1** Rietveld fitting results of BLAGSO and BLAGSO:0.04Pr<sup>3+</sup>

| Formula                         | BLAGSO            | BLAGSO:0.04Pr <sup>3+</sup> |
|---------------------------------|-------------------|-----------------------------|
| crystal system                  | cubic             | cubic                       |
| space group                     | $Ia\bar{3}d(230)$ | $Ia\bar{3}d(230)$           |
| a (Å)                           | 12.0669           | 12.0786                     |
| b (Å)                           | 12.0669           | 12.0786                     |
| c (Å)                           | 12.0669           | 12.0786                     |
| $\alpha = \beta = \gamma$ (deg) | 90                | 90                          |
| Z                               | 8                 | 8                           |
| V (Å <sup>3</sup> )             | 1757.075          | 1762.175                    |
| Rp                              | 0.0447            | 0.0452                      |
| Rwp                             | 0.0611            | 0.0623                      |
| $\chi^2$                        | 2.849             | 2.969                       |

**Table S2** Atomic positions of BLAGSO

| atom | site | x        | y       | z       | Occupancy | $U_{iso}$ |
|------|------|----------|---------|---------|-----------|-----------|
| Ba1  | 24c  | 0.125    | 0       | 0.25    | 0.3330    | 0.00612   |
| Lu1  | 24c  | 0.125    | 0       | 0.25    | 0.6670    | 0.01100   |
| Al1  | 16a  | 0        | 0       | 0       | 0.5450    | 0.01538   |
| Ga1  | 16a  | 0        | 0       | 0       | 0.4550    | 0.00777   |
| Al2  | 24d  | 0.375    | 0       | 0.25    | 0.3033    | 0.02568   |
| Ga2  | 24d  | 0.375    | 0       | 0.25    | 0.3634    | 0.01255   |
| Si1  | 24d  | 0.375    | 0       | 0.25    | 0.3333    | 0.00456   |
| O1   | 96h  | -0.03879 | 0.04806 | 0.15408 | 1.0000    | 0.02588   |

**Table S3** Atomic positions of BLAGSO:0.04Pr<sup>3+</sup>

| atom | site | x        | y       | z       | Occupancy | U <sub>iso</sub> |
|------|------|----------|---------|---------|-----------|------------------|
| Ba1  | 24c  | 0.125    | 0       | 0.25    | 0.3330    | 0.02204          |
| Lu1  | 24c  | 0.125    | 0       | 0.25    | 0.6540    | 0.01658          |
| Pr1  | 24c  | 0.125    | 0       | 0.25    | 0.0130    | 0.01610          |
| Al1  | 16a  | 0        | 0       | 0       | 0.5450    | 0.03068          |
| Ga1  | 16a  | 0        | 0       | 0       | 0.4550    | 0.01394          |
| Al2  | 24d  | 0.375    | 0       | 0.25    | 0.3033    | 0.00112          |
| Ga2  | 24d  | 0.375    | 0       | 0.25    | 0.3634    | 0.00153          |
| Si1  | 24d  | 0.375    | 0       | 0.25    | 0.3333    | 0.02567          |
| O1   | 96h  | -0.03656 | 0.04779 | 0.15299 | 1.0000    | 0.05205          |

### Reference

1. P. E. Blochl, *Phys. Rev. B*, 1994, **50**, 17953-17979.
2. J. P. Perdew and K. Burke, *Phys. Rev. Lett.*, 1996, **77**, 3865-3868.
3. G. Kresse and D. Joubert, *Phys. Rev. B*, 1999, **59**, 1758-1775.
